# Supplementary material for: Optimized performance III-nitride-perovskite-based heterojunction photodetector via asymmetric electrode configuration
Source: Royal Society of Chemistry journal article supplement (doi:10.1039/c9ra08823g), 2020-01-01
Supplement: c9ra08823g1.pdf [file c9ra08823g1.pdf]

## Supporting Information

### Optimized Performance III-Nitride-Perovskite-Based Heterojunction Photodetector via Asymmetric Electrode Configuration

Somak Mitra<sup>a</sup>, Mufasila Mumthaz Muhammed<sup>a</sup>, Norah Alwadaï<sup>ab</sup>, Dhaifallah.R. Almalawi<sup>a</sup>, Bin Xin<sup>a</sup>, Yusin Pak<sup>a</sup>, , Iman S. Roqan<sup>a\*</sup>

<sup>a</sup>King Abdullah University of Science and Technology (KAUST), Physical Sciences and Engineering Division, Thuwal 23955-6900, Saudi Arabia.

<sup>b</sup>Department of Physics, Princess Nourah bint Abdulrahman University (PNU), Riyadh 11671, Saudi Arabia.

Section 1: SEM cross section image

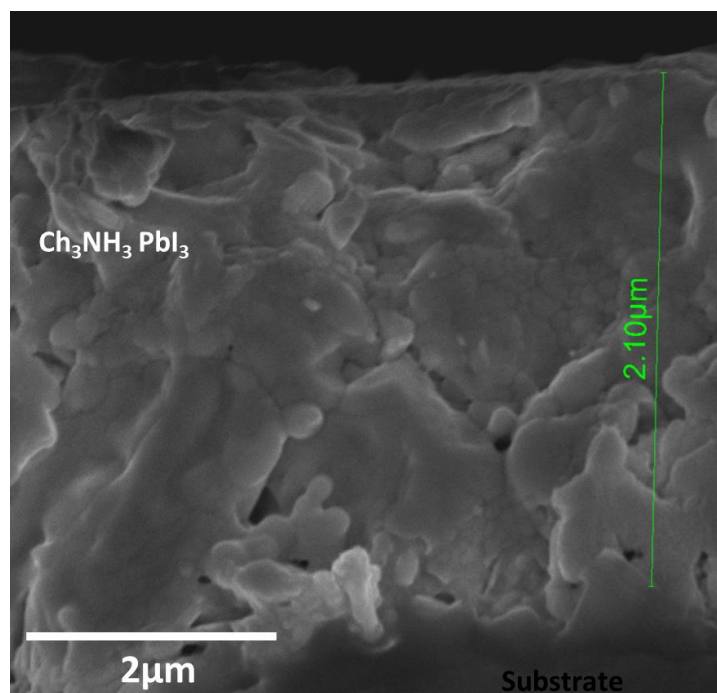

Figure S1: SEM cross-section image of the  $\text{CH}_3\text{NH}_3\text{PbI}_3$  film spray coated in Al sheet.
